# Supplementary material for: Nurses’ experiences of caring for people with COVID-19 in Hong Kong: a qualitative enquiry
Source: HighWire-hosted journal article supplement (doi:10.1136/bmjopen-2021-052683), 2021-08-01
Supplement: bmjopen-2021-052683supp001_data_supplement.pdf [file bmjopen-2021-052683supp001_data_supplement.pdf]

## Semi-structured Interview Guide

### 8 aspects:

1. Nurses: Individuals, families, co-workers (impact on physical, psychological, social and work-related aspects)
  - 1.1. Individuals  
Use a word to describe the COVID-19 outbreak.  
  
How would you describe the impact of Covid-19?  
  
What are the roles and responsibilities of nurses during the Covid-19 outbreak?
  - 1.2. Families and co-workers  
Tell me about the changes in you and others (colleagues and family members) that you have made after this experience.
2. Patients and families (physical, psychological, social and financial impact)
  - 2.1. Tell me the symptoms of those who have infected COVID-19 (those you have cared for)
  - 2.2. Your perceived needs of COVID-19 patients
  - 2.3. Your perceived needs of COVID-19 patients' families
  - 2.4. Share the support received by patients and their families
3. Caring for COVID-19 patients (positive and negative experiences; difficulties and challenges; lessons learned from past epidemics)
  - 3.1. Nurse's background  
Tell me about your nursing background, years of experience, SARS experience or experience of other infectious disease pandemic.
  - 3.2. Decision  
Who assigned you to look after COVID-19 patients?  
  
When deciding to help out during the COVID-19 outbreak (for volunteers)
  - 3.3. Caring experiences  
Tell me your experiences about caring for people diagnosed with Covid-19  
  
Tell me one of the unforgettable experiences during the period of caring for people with Covid-19.  
  
What have you learned from this experience?
  - 3.4. Challenges  
Tell me more about the things that concerned you most during the period of caring for people with Covid-19.

What challenges did you encounter when you cared for people with Covid-19?

What strategies did you take to address these challenges?

What kind of support did you get when taking care of people with Covid-19?

4. Infection control measures and practices (what works and what does not work, challenges)

4.1. What measures you perceived as most effective in combating COVID-19?

4.2. What actions you perceived as most effective to safeguard individuals, families and communities during the COVID-19 pandemic?

5. Work environment and policies (positive and negative, what can be done differently)

5.1. Work environment

Tell me about your previous and currently workplace?

5.2. Policies

From your experience, what are the current needs of general public hospitals in addressing the potential emerging and re-emerging infectious diseases?

Your perceived needs of healthcare providers

5.3. Suggestion

Where do you get information or guidance on the care of COVID-19 patients?

Which approach do you think is most effective?

From your experience, what are our current medical systems doing well?

What would you suggest to enhance the preparation of nurses to better equip them to address future infectious diseases?

Any messages you would like to give in dealing with the COVID-19 outbreak?

6. Community approaches to slow the spread of COVID-19 (most effective and hindrance)

6.1. Tell me about your view on the effective community approaches

6.2. From your experience, what are the current needs of the community in addressing the potential emerging and re-emerging infectious diseases?

7. Global approaches to combat COVID-19 (what works and what does not work, challenges)

7.1. What kind of global approaches works and what does not work?

7.2. From your experience, what are the current challenges of combat COVID-19 globally?

8. Government approaches to combat COVID-19 (what works and what does not work, challenges)
  - 8.1. What kind of government approaches works and what does not work?
  - 8.2. From your experience, what are the current needs and challenges of the government in addressing the potential emerging and re-emerging infectious diseases?
  - 8.3. Tell me about your view on the importance of public health for managing infectious diseases.

Do you have other experiences that you would like to share, but have not yet mentioned?
